# Supplementary material for: Liver Microphysiological Systems for Predicting and Evaluating Drug Effects
Source: PubMed Central journal article supplement — Clin Pharmacol Ther. 2019 Jun 4;106(1):139–47. doi: 10.1002/cpt.1458 (PMC6771674; doi:10.1002/cpt.1458), 2019-06-04
Supplement: CPT-106-139-s001.pdf [file CPT-106-139-s001.pdf]

## **SUPPLEMENTARY MATERIAL**

Accompanying the article entitled

### **Liver Microphysiological Systems for Predicting and Evaluating Drug Effects**

Alexandre J.S. Ribeiro<sup>1\*</sup>, Xinning Yang<sup>2</sup>, Vikram Patel<sup>1</sup>; Rajnikanth Madabushi<sup>2</sup>; David G. Strauss<sup>1,2</sup>

<sup>1</sup> U.S. Food and Drug Administration, Center for Drug Evaluation and Research, Office of Translational Science, Office of Clinical Pharmacology, Division of Applied Regulatory Science.

<sup>2</sup> U.S. Food and Drug Administration, Center for Drug Evaluation and Research, Office of Clinical Pharmacology.

**\* Correspondence:**

Alexandre Ribeiro  
U.S. Food and Drug Administration  
10903 New Hampshire Avenue  
Silver Spring, MD 20993  
Tel: + 301-796-0126  
Email: [Alexandre.Ribeiro@fda.hhs.gov](mailto:Alexandre.Ribeiro@fda.hhs.gov)

#### **DISCLAIMER**

This article reflects the views of the authors and should not be construed to represent the views or policies of the FDA.

#### **CONFLICT OF INTEREST**

The authors declare no conflict of interest.

#### **FUNDING INFORMATION**

The authors acknowledge support from the Defense Advanced Research Projects Agency via an Interagency Agreement with the FDA.

**Keywords:** Liver, drug development, cells, hepatic, pharmacology

### THREE-DIMENSIONAL CULTURE OF HEPATOCYTES PROLONGS HEPATIC FUNCTION IN VITRO

Preceding the development of microphysiological systems (MPS), the initial studies on three-dimensional (3D) cultures of hepatocytes revealed the development of more physiological properties in these culture systems compared with two-dimensional (2D) cultures (1-3), and improved the capacity for detection of drug-induced toxicity (4). 3D cellular organization is a characteristic of the liver microenvironment (5). However, MPS and other 3D platforms do not fully replicate the architectural complexity of the liver lobule (see **Figure 2b** in the main article) but are designed to enable long-lasting culture of hepatic cells with improved function. Overall, hepatocyte function is prolonged for a greater time in culture when cells are organized in 3D, which is a primary advantage of 3D relative to 2D cultures (6). Different studies with platforms for hepatocyte culture demonstrate the dependence of metabolism, transport, and biomarker expression on the 3D polarized morphology of these cells and on their cell-cell interactions (7). For example, polarity can be induced in hepatocytes that are cultured as 2D sandwich cultures (8), where cells are exposed to a collagen layer on the basal side and to basement membrane proteins on the apical side (**Figure 2c**).

In association with the polarization of cells, protein layers are also thought to enable a level of diffusion around cells that mimics physiological conditions (9). On one hand, sandwich cultures demonstrate how proper hepatocyte function relies on cell polarity, extracellular barrier function, and cell-cell adhesions, but on the other hand it is difficult to maintain functional hepatocytes in sandwich cultures beyond 6 to 9 days (10-13). 3D cultures are a more suitable alternative for assays that rely on prolonging cellular mechanisms of liver function beyond 21 days (6, 12, 14). More than a decade of work on 3D hepatocyte culture platforms demonstrates that cellular shape, extracellular diffusion and adhesions are more physiological when hepatocytes are cultured in 3D, which may define better cellular conditions to prolong the *in vitro* lifetime of their functional activity. This condition is required to study subchronic drug effects (15), drug-drug interactions involving enzyme regulation (16), or disease states or conditions for testing drug efficacy that rely on long-term exposure to a pathogen (17) or on the development of malignant microenvironment conditions (18). In addition to culturing cells in 3D, liver MPS also expose cells to media flow and to interactions with other types of hepatic cells (e.g., Kupffer cells, stellate cells, endothelial cells, and fibroblasts). The contribution of each of these factors on the function of hepatocytes is not clearly understood and is discussed here.

Even with considerable advances in the field of MPS, the complexity of liver microarchitecture and structural organization, as illustrated in **Figure 2b**, is still not fully replicated in the systems represented in **Figures 2d, 2e, and 2f**. However, microfabrication approaches can improve the

complexity of MPS and replicate more *in vivo* settings in these systems. For example, separation of bile from media is absent from most liver MPS, but some systems have already demonstrated the possibility of enabling this type of fluid separation (19). Regarding bile separation from media, future research should evaluate how this feature may affect the performance of MPS and potentially evaluate if the presence or absence of bile counterflow affects the modeling and predictive capabilities of liver systems. However, increasing the complexity of *in vitro* systems often presents the risk of decreasing the capability to control device properties that may affect cell function. Therefore, device changes in MPS that aim to enhance their physiology should naturally be followed by comprehensive evaluations on how they affect MPS robustness and reliability in applications that aim to model or predict drug effects.

### **FLOWING MEDIA IN HEPATOCYTE-BASED MICROTISSUES SETS LEVELS OF OXYGENATION THROUGH CONTROLLED OXYGEN TRANSPORT**

Given the microfluidic component of MPS, hepatic microtissues in these systems are exposed to flowing media. The use of flow or stirring to culture hepatocytes has followed pragmatic experimental goals of mass transfer to set culture conditions, and only recently has the field become concerned with understanding the mechanistic changes induced by flow in hepatocytes (2, 20-22). Hepatocytes in 2D exposed to flow have higher metabolic activity and secrete higher levels of albumin and urea for a longer culture time (23). These results clearly show an effect of flow characteristics on hepatocyte function that is independent of other microenvironment properties, such as 3D, extracellular adhesion proteins, the presence of other cell types, and specialized culture media. Overall for adherent cells, flow can directly affect cellular properties through mechanical activation of biological pathways (24, 25) or indirectly affect them through improved mass transfer that enables controlling the levels of oxygen and media nutrients around cells (23, 26). In the case of hepatocytes, few studies have focused on the potential mechanotransduction effects of fluid shear flow on their mechanobiology (27). Therefore, instead of flowing media to directly activate biological pathways via mechanosensing of extracellular shear flow (28), the main target for flowing media in advanced hepatocyte cultures is to replicate levels of oxygen as they physiologically occur in different zones along each sinusoidal unit of hepatic lobules (**Figure 3**) (29).

There are three different zones within the *in vivo* hepatic lobule that differ in oxygen concentration, metabolic activity, and gene expression (30). The sinusoid regions closer to the central vein (Zone 3) have an oxygen tension of 30 to 35 mm Hg (42 to 49  $\mu$ M), while this value is closer to 60 to 65 mm Hg (84 to 91  $\mu$ M) in the terminal end of the sinusoids (Zone 1), where the bile ducts, hepatic

arterioles, and portal venules are located (31). Zone 2 of the hepatic sinusoid is between these two regions and contains intermediate levels of oxygen between Zone 1 and Zone 3. The characteristics of the metabolic zones of the hepatic sinusoid in relation to oxygen concentration, regulation of gene expression, and other markers of hepatic function have been well reviewed by Kietzmann (30). In addition, Soto-Gutierrez and colleagues (29) reviewed in detail how defects in the metabolic zones lead to pathophysiological scenarios of liver disease and cancer. These authors further described the potential of MPS and other hepatic cellular systems to model the role of liver zones in the development of disease.

Wnt/ $\beta$ -catenin signaling is one of the main targets of modulating oxygen concentrations in hepatocytes, which is most active in the central vein region and reduced in the extremity of the hepatic sinusoid (29, 30, 32, 33). Understanding this regulation is important for modeling drug hepatic effects because the Wnt/ $\beta$ -catenin pathway plays a strong role in regulating liver function (34-36). Therefore, the ability to modulate this pathway by varying oxygen tension with different flow rates clearly illustrates the potential of MPS to enable mechanistic understanding of drug effects.

Of general interest for regulating Wnt/ $\beta$ -catenin signaling *in vitro*, cellular studies have shown a potential for modulation of this pathway with varied profiles of extracellular fluid flow (37-39). Furthermore, mechanical stimulation of cells generally affects Wnt/ $\beta$ -catenin signaling (40-43), which raises the possibility of having an effect of flow on hepatocytes that involves mechanical forces exerted on cells, independently of oxygen regulation. In addition to modeling more physiological cellular settings in drug development, regulating this signaling pathway is also important for evaluating drug efficacy, mechanisms, or side effects that depend on it (44-47).

### **RECREATING THE EFFECTS OF MULTICELLULAR INTERACTIONS WITH LIVER MPS**

Hepatocytes are the units of liver function and contain the molecular machinery that metabolizes and transports drugs and metabolites (8, 48, 49). However, nonparenchymal hepatic cells [e.g., Kupffer cells (50), stellate cells (51, 52), and sinusoidal endothelial cells (53)] also regulate liver function and hepatic drug effects. Beyond setting a more physiological microenvironment, the inclusion of nonparenchymal cells further allows studying the role in drug responses of distinct biological pathways that regulate immune responses. For this context of use of liver MPS, further research should define immune mechanisms that solely depend on liver cells and differentiate these from effects that depend on other organs or adaptive immunity (54).

Overall, MPS are developed to co-culture different cell types, which is achieved through the establishment of intercellular interactions in 3D. In general, co-culturing cells in standard 2D plates/wells does not lead to physiological-like remodeling of the extracellular microenvironment and of intercellular interactions that occur in 3D systems (55-57). However, studies with co-cultures of hepatic cells in 2D show the ability to better evaluate the biological effects of other liver cell types on hepatocyte function, and a prolongation of hepatocyte physiology in co-cultures relative to monocultures (58-60).

It is natural to assume that liver MPS can further maintain a functional co-culture of hepatic cells beyond one month because cells are also cultured in 3D and under flow. However, different uses of MPS with relevance to drug development have demonstrated the importance of including multiple cell types in these systems to better evaluate specific mechanistic effects of drugs. In general, studies on MPS with co-cultures tend to use physiological ranges of ratios of different cell types in cell combinations, but further work should evaluate how varying the percentage of different cell types in a co-culture impacts cellular function and drug responses.

The next section summarizes the relevance of including different cell types for regulatory applications, where the presence of specific cell types dictates the ability to replicate physiological settings *in vitro*.

#### **DIFFERENT HEPATIC CELL TYPES TO BE CO-CULTURED WITH HEPATOCYTES IN MPS**

Kupffer cells reside within the lumen of liver sinusoids (**Figure 2**) and are nonparenchymal specialized macrophages with roles in regulating innate immunity, constituting up to 90% of the overall number of macrophages in the body (61). These cells constitute approximately 15% of the total population of cells in the liver (62), and occupy 2% of the liver volume/mass (63). The role and abundance of these cells reveals the pivotal role of the liver in systemic immunity, a topic that has been reviewed elsewhere (64). The primary interest of co-culturing Kupffer cells with hepatocytes in MPS for *in vitro* prediction of clinical drug effects relates to the roles of this cell type in inflammatory-induced liver toxicity or damage (16-18, 65). The hepatic properties of MPS are not altered with the presence of Kupffer cells, but the role of inflammatory pathways in drug-induced liver injury or other liver functional properties can only be evaluated when these cells are present. For example, co-culture of Kupffer cells with hepatocytes in MPS does not affect CYP activity, albumin production, or infection rates of hepatitis B virus. However, the activation of Kupffer cells suppresses the replication of hepatitis B virus in MPS, replicating levels of inflammatory clinical response (17).

Liver sinusoidal endothelial cells account for 15 to 20% of cells in the liver but represent only 3% of the total organ volume (53). These cells compose the permeable barrier that enables the active uptake, degradation, and exchange of drugs and metabolites along the sinusoid (66), as represented in **Figure 2b**. Co-culturing hepatocytes with these cells improves hepatocyte metabolic function and increases the expression of albumin, which relates to physiological liver function (67). Therefore, including these cells in MPS will prolong and increase the physiological relevance of hepatic function of these systems. However, drug development may also benefit from testing specific mechanistic properties that are regulated by endothelial cell activity. Beyond their barrier function, liver sinusoidal endothelial cells have additional and distinct roles in liver development, regulation of sinusoid blood flow, clearance of toxic molecules, inflammation, and liver regeneration after injury or hepatectomy (53). Therefore, the presence of these cells in MPS can enable the investigation of different functional properties of the liver, but also presents difficulties in clearly defining their contexts of use in drug development.

By setting media flow and gradients of oxygen tension, MPS can facilitate the tuning of optimal microenvironment conditions for maintaining functional liver sinusoidal endothelial cells in culture (68). Oxygen tension affects the size, localization, and function of liver sinusoidal endothelial cells, playing clear roles in liver development and regeneration (69-71). As opposed to the effects on hepatocytes, the pattern of shear flow along the sinusoid directly affects endothelial cell function via defined mechanotransduction pathways (72, 73). For example, most of the vasodilating agent nitric oxide in the liver is produced by liver endothelial cells due to activation by shear force of endothelial nitric synthase (74). In conclusion, the effects of oxygen and shear stress in the physiology of liver endothelial cells can be tuned with MPS due to their microfluidic nature (68).

Of interest to drug development, liver sinusoidal endothelial cells differ from other types of endothelial cells in terms of endocytic activity and absence of the basement membrane that regulates the barrier function of endothelial tissues (53). Liver endothelial cells have a high endocytic activity for clearance of toxic molecules, and are one of the known human cell types with the highest endocytic activity (75). Other types of endothelial cells lack this functional property. In addition, basement membrane is a hallmark of endothelial barriers (76, 77), which is absent from the barrier formed by sinusoid endothelial cells. Therefore, the use of other types of endothelial cells in liver MPS may not yield a physiologically relevant liver-specific activity induced by liver sinusoidal endothelial cells. Given the endocytic activity of these cells, it is reasonable to assume that they may be involved in hepatic drug response and required for specific contexts of use in drug evaluation. Different studies show that

sinusoidal endothelial cells play roles in the effects of drugs in liver function (78). For example, endothelial cells are targeted by metabolites from the bioprocessing of drugs and secreted by hepatocytes (e.g., acetaminophen, cyclophosphamide) (79, 80) and metabolically activate compounds that lead to cellular damage and toxicity (e.g., acetaminophen, monocrotaline, dacarbazine) (80-82).

Stellate cells account for 5 to 8% of cells in the liver, occupy 13% of the cellular volume of the sinusoid, and are located in the space of Disse (**Figure 2b**) that separates the endothelial layer from interconnected hepatocytes (83). Hepatic stellate cells play different physiological roles, such as retinoid storage and release (84), regulation of sinusoidal microcirculation (83), remodeling of the extracellular matrix (85), liver development (86), and maintaining the microenvironment homeostasis of paracrine factors via the uptake and release of cytokines and other regulatory factors (87). In theory, the use of stellate cells in liver MPS should aim to partially recreate a set of these functions *in vitro*. Non-controlled activation of stellate cells from a quiescent state occurs easily *in vitro* or upon cryopreservation, and it is difficult to revert these cells back to a physiologically quiescent state (88, 89). For this reason, it has been difficult to incorporate these cells in MPS (90).

Despite this difficulty, co-culture of stellate cells with parenchymal and nonparenchymal hepatic cells in MPS has been reported in different studies (65, 91, 92). In these, stellate cells seemed to enhance metabolic activity of hepatocytes and general hepatic properties, as well as prolonging the time for which hepatocytes lasted in culture as functional cells. In addition, these co-culture systems have shown improved performance for detecting drug-induced hepatic effects, demonstrating the potential for the use of stellate cells in MPS for drug development purposes (91-93). However, improving the ability to control the activation of stellate cells into matrix-remodeling and contractile fibroblast-like cells remains the major challenge for leveraging their potential in improving the use of MPS.

Related to the physiological roles of quiescent stellate cells, their activation is linked to different pathophysiological mechanisms, such as liver fibrosis (94), cancer progression and mitigation (86, 95), and liver regeneration (86). Given the pathophysiological roles of stellate cells, different pharmacological interventions targeting them have been researched with the intent of developing therapeutic strategies to treat disease settings involving liver fibrosis (96). Therefore, MPS with stellate cells could be used to model the efficacy of such interventions.

In the context of cancer treatment, 3D spheroids have been shown to model interactions between cancer cells and stellate cells that affect tumor chemoresistance (95), further demonstrating the potential of using stellate cells to predict drug efficacy in specific contexts of use. Inclusion of stellate cells in MPS for evaluating drug safety could potentially screen for drugs with side effects that

target stellate cells and affect their physiological roles or improve the prediction of drug inflammatory effects (97). In conclusion, replicating the different physiological roles of stellate cells in MPS could set different contexts of use for MPS related to drug hepatic effects.

## **CELL SOURCES AND THE POTENTIAL OF DIFFERENTIATING HUMAN INDUCED PLURIPOTENT STEM CELLS**

Overall, establishing reliable cell sources and ensuring the quality of cellular materials to integrate MPS is one of the major roadblocks for using these systems in drug development (98). Given the known differences between humans and other species in metabolism, transport, and other hepatic properties (99-102), cells in MPS must be of human origin and have human-specific function to predict clinical drug effects. In general, cells isolated from human livers (18, 65, 103) or cells differentiated from human iPSCs (104, 105) have been used in the liver MPS field. So far, with the most recent differentiation protocols, the function, drug metabolism, gene expression, and protein-protein interactions of iPSC-differentiated hepatocytes do not fully resemble what is observed in primary hepatocytes (106-108). Primary hepatocytes and primary hepatic cells in general are still the most mature and physiologically relevant cell types to use in liver MPS due to these differences and variable efficiency of iPSC differentiation (109). However, as occurs generally for most tissue-specific primary cells, the quality of cells isolated from human liver depends on the quality of tissue origin and experimental variables inherent to isolation and cryopreservation techniques (110). In addition, iPSC-differentiated cells have a potential for replicating genetic backgrounds that may represent different populations, minorities, and rare disease states, which is not trivial to achieve by banking primary hepatic cells (111). Therefore, iPSC-differentiated cells can overcome several limitations associated with the use of primary hepatocytes, which are still the gold standard for cellular materials to use in liver MPS.

More reliable iPSC-differentiated models can originate from further research in improving differentiation and maturation protocols (112-115), as well as in setting standards for cell handling and use (98). The liver consists of endoderm-derived hepatocytes, biliary lineages, and various mesoderm-derived cells (116-118), and the differentiation of all different cell types in the liver must involve different specialized differentiation protocols. Therefore, inducing simultaneous differentiation of all cell types in the same culture microenvironment may be difficult given the need for different protocols for each cell type (119-121).

Most importantly, iPSC-hepatocytes differ biologically from primary hepatocytes in properties that define hepatic maturity (119). For example, dramatic differences exist in biomarker expression (e.g.,



albumin and urea), binucleation, gene expression, metabolism, and transport (119, 122, 123). Maturity of cells differentiated from iPSCs is still the main limitation of this technology, but the field is progressing quickly towards enhancing the maturity of iPSC-differentiated hepatic-like cells and evaluating their potential contexts of use (122) despite the biological disparities between these cells and primary hepatic lineages. Beyond improvement of differentiation protocols based on small molecules or transcription factors, more physiological culture conditions have been shown to enhance the functional maturity of iPSC-derived hepatocytes. Some of these conditions include micropatterning cells, co-culturing with other cell types, controlled oxygenation, and 3D cultures (104, 106, 114, 124). These results strongly suggest that MPS can also be used and designed to improve the maturity of iPSC-derived hepatocytes and the physiological relevance of drug assays with these cells.

## REFERENCES

- (1) Landry, J., Bernier, D., Ouellet, C., Goyette, R. & Marceau, N. Spheroidal aggregate culture of rat liver cells: histotypic reorganization, biomatrix deposition, and maintenance of functional activities. *J. Cell Biol.* **101**, 914-923 (1985).
- (2) Griffith, L.G., Wu, B., Cima, M.J., Powers, M.J., Chaignaud, B. & Vacanti, J.P. In vitro organogenesis of liver tissue. *Ann. N. Y. Acad. Sci.* **831**, 382-397 (1997).
- (3) Gomez-Lechon, M.J. *et al.* Long-term expression of differentiated functions in hepatocytes cultured in three-dimensional collagen matrix. *J. Cell Physiol.* **177**, 553-562 (1998).
- (4) Lee, J., Lilly, G.D., Doty, R.C., Podsiadlo, P. & Kotov, N.A. In vitro toxicity testing of nanoparticles in 3D cell culture. *Small* **5**, 1213-1221 (2009).
- (5) Sasse, D., Spornitz, U.M. & Maly, I.P. Liver architecture. *Enzyme* **46**, 8-32 (1992).
- (6) Elliott, N.T. & Yuan, F. A review of three-dimensional in vitro tissue models for drug discovery and transport studies. *J. Pharm. Sci.* **100**, 59-74 (2011).
- (7) Treyer, A. & MÜsch, A. Hepatocyte Polarity. *Compr Physiol* **3**, 243-87 (2013).
- (8) Swift, B., Pfeifer, N.D. & Brouwer, K.L.R. Sandwich-cultured hepatocytes: an in vitro model to evaluate hepatobiliary transporter-based drug interactions and hepatotoxicity. *Drug. Metab. Rev.* **42**, 446-471 (2010).
- (9) Kern, A., Bader, A., Pichlmayr, R. & Sewing, K.F. Drug metabolism in hepatocyte sandwich cultures of rats and humans. *Biochem. Pharmacol.* **54**, 761-772 (1997).
- (10) Godoy, P. *et al.* Extracellular matrix modulates sensitivity of hepatocytes to fibroblastoid dedifferentiation and transforming growth factor beta-induced apoptosis. *Hepatology* **49**, 2031-2043 (2009).
- (11) Greer, M.L., Barber, J., Eakins, J. & Kenna, J.G. Cell based approaches for evaluation of drug-induced liver injury. *Toxicology* **268**, 125-131 (2010).
- (12) Kostadinova, R. *et al.* A long-term three dimensional liver co-culture system for improved prediction of clinically relevant drug-induced hepatotoxicity. *Toxicol. Appl. Pharmacol.* **268**, 1-16 (2013).
- (13) Heslop, J.A. *et al.* Mechanistic evaluation of primary human hepatocyte culture using global proteomic analysis reveals a selective dedifferentiation profile. *Arch. Toxicol.* **91**, 439-452 (2017).

- (14) Miranda, J.P., Leite, S.B., Muller-Vieira, U., Rodrigues, A., Carrondo, M.J. & Alves, P.M. Towards an extended functional hepatocyte in vitro culture. *Tissue Eng. Part C Methods* **15**, 157-167 (2009).
- (15) Vorrink, S.U., Zhou, Y., Ingelman-Sundberg, M. & Lauschke, V.M. Prediction of drug-induced hepatotoxicity using long-term stable primary hepatic 3D spheroid cultures in chemically defined conditions. *Toxicol. Sci.* **163**, 655-665 (2018).
- (16) Long, T.J. *et al.* Modeling therapeutic antibody-small molecule drug-drug interactions using a three-dimensional perfusable human liver coculture platform. *Drug Metab. Dispos.* **44**, 1940-1948 (2016).
- (17) Ortega-Prieto, A.M. *et al.* 3D microfluidic liver cultures as a physiological preclinical tool for hepatitis B virus infection. *Nat. Commun.* **9**, 682 (2018).
- (18) Kostrzewski, T. *et al.* Three-dimensional perfused human in vitro model of non-alcoholic fatty liver disease. *World J. Gastroenterol.* **23**, 204-215 (2017).
- (19) Nakao, Y., Kimura, H., Sakai, Y. & Fujii, T. Bile canaliculi formation by aligning rat primary hepatocytes in a microfluidic device. *Biomicrofluidics* **5**, 22212 (2011).
- (20) Takeshita, K., Bowen, W.C. & Michalopoulos, G.K. Three-dimensional culture of hepatocytes in a continuously flowing medium. *In Vitro Cell Dev. Biol. Anim.* **34**, 482-485 (1998).
- (21) Nibourg, G.A. *et al.* Perfusion flow rate substantially contributes to the performance of the HepaRG-AMC-bioartificial liver. *Biotechnol. Bioeng.* **109**, 3182-3188 (2012).
- (22) Rebelo, S.P., Costa, R., Sousa, M.F., Brito, C. & Alves, P.M. Establishing liver bioreactors for in vitro research. *Methods Mol. Biol.* **1250**, 189-202 (2015).
- (23) Hegde, M. *et al.* Dynamic interplay of flow and collagen stabilizes primary hepatocytes culture in a microfluidic platform. *Lab. Chip* **14**, 2033-2039 (2014).
- (24) Dahl, K.N., Ribeiro, A.J. & Lammerding, J. Nuclear shape, mechanics, and mechanotransduction. *Circ. Res.* **102**, 1307-1318 (2008).
- (25) Ando, J. & Yamamoto, K. Vascular mechanobiology: endothelial cell responses to fluid shear stress. *Circ. J.* **73**, 1983-1992 (2009).
- (26) Bergemann, C. *et al.* Cellular nutrition in complex three-dimensional scaffolds: a comparison between experiments and computer simulations. *Int. J. Biomater.* **2015**, 584362 (2015).
- (27) Nakatsuka, H. *et al.* Shear stress induces hepatocyte PAI-1 gene expression through cooperative Sp1/Ets-1 activation of transcription. *Am. J. Physiol. Gastrointest. Liver Physiol.* **291**, G26-G34 (2006).
- (28) Givens, C. & Tzima, E. Endothelial mechanosignaling: does one sensor fit all? *Antioxid. Redox. Signal* **25**, 373-388 (2016).
- (29) Soto-Gutierrez, A., Gough, A., Vernetti, L.A., Taylor, D.L. & Monga, S.P. Pre-clinical and clinical investigations of metabolic zonation in liver diseases: the potential of microphysiology systems. *Exp. Biol. Med. (Maywood)* **242**, 1605-1616 (2017).
- (30) Kietzmann, T. Metabolic zonation of the liver: The oxygen gradient revisited. *Redox. Bio.l* **11**, 622-630 (2017).
- (31) Greger, R. & Bleich, M. Normal values for physiological parameters. In: *Comprehensive Human Physiology: From Cellular Mechanisms to Integration* (eds. Greger, R. and Windhorst, U.) 2427-2449 (Springer Berlin Heidelberg, Berlin, Heidelberg, 1996).
- (32) Gebhardt, R. & Matz-Soja, M. Liver zonation: novel aspects of its regulation and its impact on homeostasis. *World J. Gastroenterol.* **20**, 8491-8504 (2014).
- (33) Yang, J. *et al.* beta-catenin signaling in murine liver zonation and regeneration: a Wnt-Wnt situation! *Hepatology* **60**, 964-976 (2014).
- (34) Behari, J. The Wnt/beta-catenin signaling pathway in liver biology and disease. *Expert Rev. Gastroenterol. Hepatol.* **4**, 745-756 (2010).

- (35) Monga, S.P. Role of Wnt/beta-catenin signaling in liver metabolism and cancer. *Int. J. Biochem. Cell Biol* **43**, 1021-1029 (2011).
- (36) Monga, S.P. Role and regulation of beta-catenin signaling during physiological liver growth. *Gene Expr.* **16**, 51-62 (2014).
- (37) Jia, Y.Y. *et al.* Fluid flow modulates the expression of genes involved in the Wnt signaling pathway in osteoblasts in 3D culture conditions. *Int. J. Mol. Med.* **33**, 1282-1288 (2014).
- (38) Huang, J. *et al.* Crosstalk between MLO-Y4 osteocytes and C2C12 muscle cells is mediated by the Wnt/beta-catenin pathway. *JBMR Plus* **1**, 86-100 (2017).
- (39) Yan, Z. *et al.* Fluid shear stress improves morphology, cytoskeleton architecture, viability, and regulates cytokine expression in a time-dependent manner in MLO-Y4 cells. *Cell. Biol. Int.* **42**, 1410-1422 (2018).
- (40) Benham-Pyle, B.W., Pruitt, B.L. & Nelson, W.J. Mechanical strain induces E-cadherin-dependent Yap1 and  $\beta$ -catenin activation to drive cell cycle entry. *Science* **348**, 1024-1027 (2015).
- (41) Cha, B. *et al.* Mechanotransduction activates canonical Wnt/ $\beta$ -catenin signaling to promote lymphatic vascular patterning and the development of lymphatic and lymphovenous valves. *Genes Dev.* **30**, 1454-1469 (2016).
- (42) Benham-Pyle, B.W., Sim, J.Y., Hart, K.C., Pruitt, B.L. & Nelson, W.J. Increasing  $\beta$ -catenin/Wnt3A activity levels drive mechanical strain-induced cell cycle progression through mitosis. *eLife* **5**, pii: e19799 (2016).
- (43) Cheleschi, S. *et al.* Hydrostatic pressure regulates microRNA expression levels in osteoarthritic chondrocyte cultures via the Wnt/beta-catenin pathway. *Int. J. Mol. Sci.* **18**, pii: E133 (2017).
- (44) Huynh, T.T. *et al.* Destruxin B inhibits hepatocellular carcinoma cell growth through modulation of the Wnt/beta-catenin signaling pathway and epithelial-mesenchymal transition. *Toxicol. In Vitro* **28**, 552-561 (2014).
- (45) Ma, L., Wang, X., Jia, T., Wei, W., Chua, M.S. & So, S. Tankyrase inhibitors attenuate WNT/beta-catenin signaling and inhibit growth of hepatocellular carcinoma cells. *Oncotarget* **6**, 25390-25401 (2015).
- (46) Thomas, M. *et al.* Peroxisome proliferator-activated receptor alpha, PPARalpha, directly regulates transcription of cytochrome P450 CYP2C8. *Front. Pharmacol.* **6**, 261 (2015).
- (47) Fako, V., Yu, Z., Henrich, C.J., Ransom, T., Budhu, A.S. & Wang, X.W. Inhibition of Wnt/beta-catenin signaling in hepatocellular carcinoma by an antipsychotic drug pimozide. *Int. J. Biol. Sci.* **12**, 768-75 (2016).
- (48) Gerets, H.H.J. *et al.* Characterization of primary human hepatocytes, HepG2 cells, and HepaRG cells at the mRNA level and CYP activity in response to inducers and their predictivity for the detection of human hepatotoxins. *Cell. Biol. Toxicol.* **28**, 69-87 (2012).
- (49) Gissen, P. & Arias, I.M. Structural and functional hepatocyte polarity and liver disease. *J. Hepatol.* **63**, 1023-1037 (2015).
- (50) Dixon, L.J., Barnes, M., Tang, H., Pritchard, M.T. & Nagy, L.E. Kupffer cells in the liver. *Compr. Physiol.* **3**, 785-797 (2013).
- (51) Puche, J.E., Saiman, Y. & Friedman, S.L. Hepatic stellate cells and liver fibrosis. *Compr. Physiol.* **3**, 1473-1492 (2013).
- (52) Kordes, C., Sawitzka, I., Gotze, S., Schumacher, E. & Haussinger, D. Beyond fibrosis: stellate cells as liver stem cells. *Z. Gastroenterol.* **53**, 1425-1431 (2015).
- (53) Poisson, J. *et al.* Liver sinusoidal endothelial cells: physiology and role in liver diseases. *J. Hepatol.* **66**, 212-227 (2017).
- (54) Ramadan, Q. & Gijs, M.A. In vitro micro-physiological models for translational immunology. *Lab. Chip* **15**, 614-636 (2015).

- (55) Godoy, P. *et al.* Recent advances in 2D and 3D in vitro systems using primary hepatocytes, alternative hepatocyte sources and non-parenchymal liver cells and their use in investigating mechanisms of hepatotoxicity, cell signaling and ADME. *Arch. Toxicol.* **87**, 1315-1530 (2013).
- (56) Knight, E. & Przyborski, S. Advances in 3D cell culture technologies enabling tissue-like structures to be created in vitro. *J. Anat.* **227**, 746-756 (2015).
- (57) Wrzesinski, K. & Fey, S.J. From 2D to 3D--a new dimension for modelling the effect of natural products on human tissue. *Curr. Pharm. Des.* **21**, 5605-5616 (2015).
- (58) Hoebe, K.H., Witkamp, R.F., Fink-Gremmels, J., Van Miert, A.S. & Monshouwer, M. Direct cell-to-cell contact between Kupffer cells and hepatocytes augments endotoxin-induced hepatic injury. *Am. J. Physiol. Gastrointest. Liver Physiol.* **280**, G720-G728 (2001).
- (59) Krause, P., Saghatolislam, F., Koenig, S., Unthan-Fechner, K. & Probst, I. Maintaining hepatocyte differentiation in vitro through co-culture with hepatic stellate cells. *In Vitro Cell. Dev. Biol. Anim.* **45**, 205-212 (2009).
- (60) Ware, B.R., Durham, M.J., Monckton, C.P. & Khetani, S.R. A cell culture platform to maintain long-term phenotype of primary human hepatocytes and endothelial cells. *Cell. Mol. Gastroenterol. Hepatol.* **5**, 187-207 (2018).
- (61) Bilzer, M., Roggel, F. & Gerbes, A.L. Role of Kupffer cells in host defense and liver disease. *Liver Int.* **26**, 1175-1186 (2006).
- (62) Vollmar, B. & Menger, M.D. The hepatic microcirculation: mechanistic contributions and therapeutic targets in liver injury and repair. *Physiol. Rev.* **89**, 1269-1339 (2009).
- (63) Tsutsumi, V., Nakamura, T., Ueno, T., Torimura, T. & Aguirre-García, J. Chapter 2 - Structure and ultrastructure of the normal and diseased liver. In: *Liver Pathophysiology* (ed. Muriel, P.) 23-44 (Academic Press, Boston, 2017).
- (64) Knolle, P.A. Staying local-antigen presentation in the liver. *Curr. Opin. Immunol.* **40**, 36-42 (2016).
- (65) Clark, A. *et al.* A liver microphysiological system of tumor cell dormancy and inflammatory responsiveness is affected by scaffold properties. *Lab. Chip* **17**, 156-168 (2016).
- (66) Braet, F. & Wisse, E. Structural and functional aspects of liver sinusoidal endothelial cell fenestrae: a review. *Comp. Hepatol.* **1**, 1 (2002).
- (67) Ahmed, H.M.M., Salerno, S., Morelli, S., Giorno, L. & De Bartolo, L. 3D liver membrane system by co-culturing human hepatocytes, sinusoidal endothelial and stellate cells. *Biofabrication* **9**, 025022 (2017).
- (68) Li, X., George, S.M., Verneti, L., Gough, A.H. & Taylor, D.L. A glass-based, continuously zoned and vascularized human liver acinus microphysiological system (vLAMPS) designed for experimental modeling of diseases and ADME/TOX. *Lab. Chip* **18**, 2614-2631 (2018).
- (69) Ni, Y. *et al.* Pathological process of liver sinusoidal endothelial cells in liver diseases. *World J. Gastroenterol.* **23**, 7666-7677 (2017).
- (70) Xie, G., Wang, L., Wang, X., Wang, L. & DeLeve, L.D. Isolation of periportal, midlobular, and centrilobular rat liver sinusoidal endothelial cells enables study of zoned drug toxicity. *Am. J. Physiol. Gastrointest. Liver Physiol.* **299**, G1204-G1210 (2010).
- (71) Wisse, E., De Zanger, R.B., Charels, K., Van Der Smissen, P. & McCuskey, R.S. The liver sieve: considerations concerning the structure and function of endothelial fenestrae, the sinusoidal wall and the space of Disse. *Hepatology* **5**, 683-692 (1985).
- (72) Davies, P.F. Flow-mediated endothelial mechanotransduction. *Physiol. Rev.* **75**, 519-560 (1995).
- (73) Braet, F. *et al.* Liver sinusoidal endothelial cell modulation upon resection and shear stress in vitro. *Comp. Hepatol.* **3**, 7 (2004).
- (74) Shah, V. *et al.* Liver sinusoidal endothelial cells are responsible for nitric oxide modulation of resistance in the hepatic sinusoids. *J. Clin. Invest.* **100**, 2923-2930 (1997).

- (75) Knolle, P.A. & Wohlleber, D. Immunological functions of liver sinusoidal endothelial cells. *Cell Mol. Immunol.* **13**, 347-353 (2016).
- (76) LeBleu, V.S., Macdonald, B. & Kalluri, R. Structure and function of basement membranes. *Exp. Biol. Med. (Maywood)* **232**, 1121-1129 (2007).
- (77) Reymond, N., d'Agua, B.B. & Ridley, A.J. Crossing the endothelial barrier during metastasis. *Nat. Rev. Cancer* **13**, 858-780 (2013).
- (78) DeLeve, L.D. Chapter 8 - Liver sinusoidal endothelial cells and liver injury. In: *Drug-Induced Liver Disease (Third Edition)* (eds. Kaplowitz, N. and DeLeve, L.D.) 135-146 (Academic Press, Boston, 2013).
- (79) DeLeve, L.D. Cellular target of cyclophosphamide toxicity in the murine liver: role of glutathione and site of metabolic activation. *Hepatology* **24**, 830-837 (1996).
- (80) DeLeve, L.D., Wang, X., Kaplowitz, N., Shulman, H.M., Bart, J.A. & van der Hoek, A. Sinusoidal endothelial cells as a target for acetaminophen toxicity. Direct action versus requirement for hepatocyte activation in different mouse strains. *Biochem. Pharmacol.* **53**, 1339-1345 (1997).
- (81) DeLeve, L.D., Wang, X., Kuhlenkamp, J.F. & Kaplowitz, N. Toxicity of azathioprine and monocrotaline in murine sinusoidal endothelial cells and hepatocytes: the role of glutathione and relevance to hepatic venoocclusive disease. *Hepatology* **23**, 589-599 (1996).
- (82) Deleve, L.D. Dacarbazine toxicity in murine liver cells: a model of hepatic endothelial injury and glutathione defense. *J. Pharmacol. Exp. Ther.* **268**, 1261-1270 (1994).
- (83) Reynaert, H., Thompson, M.G., Thomas, T. & Geerts, A. Hepatic stellate cells: role in microcirculation and pathophysiology of portal hypertension. *Gut* **50**, 571-581 (2002).
- (84) Senoo, H., Yoshikawa, K., Morii, M., Miura, M., Imai, K. & Mezaki, Y. Hepatic stellate cell (vitamin A-storing cell) and its relative--past, present and future. *Cell. Biol. Int.* **34**, 1247-1272 (2010).
- (85) Geerts, A. History, heterogeneity, developmental biology, and functions of quiescent hepatic stellate cells. *Semin. Liver. Dis.* **21**, 311-335 (2001).
- (86) Yin, C., Evason, K.J., Asahina, K. & Stainier, D.Y. Hepatic stellate cells in liver development, regeneration, and cancer. *J. Clin. Invest.* **123**, 1902-1910 (2013).
- (87) Wright, J.H. *et al.* Paracrine activation of hepatic stellate cells in platelet-derived growth factor C transgenic mice: evidence for stromal induction of hepatocellular carcinoma. *Int. J. Cancer* **134**, 778-788 (2014).
- (88) Neyzen, S. *et al.* Cryopreservation of hepatic stellate cells. *J. Hepatol.* **44**, 910-917 (2006).
- (89) El Taghdouini, A., Najimi, M., Sancho-Bru, P., Sokal, E. & van Grunsven, L.A. In vitro reversion of activated primary human hepatic stellate cells. *Fibrogenesis Tissue Repair* **8**, 14 (2015).
- (90) Chen, W.L.K. *et al.* Integrated gut/liver microphysiological systems elucidates inflammatory inter-tissue crosstalk. *Biotechnol. Bioeng.* **114**, 2648-2659 (2017).
- (91) Maschmeyer, I. *et al.* A four-organ-chip for interconnected long-term co-culture of human intestine, liver, skin and kidney equivalents. *Lab. Chip* **15**, 2688-2699 (2015).
- (92) Skardal, A. *et al.* Multi-tissue interactions in an integrated three-tissue organ-on-a-chip platform. *Sci. Rep.* **7**, 8837 (2017).
- (93) Davidson, M.D., Kukla, D.A. & Khetani, S.R. Microengineered cultures containing human hepatic stellate cells and hepatocytes for drug development. *Integr. Biol. (Camb)* **9**, 662-677 (2017).
- (94) Schuppan, D. & Kim, Y.O. Evolving therapies for liver fibrosis. *J. Clin. Invest.* **123**, 1887-1901 (2013).
- (95) Song, Y., Kim, S.H., Kim, K.M., Choi, E.K., Kim, J. & Seo, H.R. Activated hepatic stellate cells play pivotal roles in hepatocellular carcinoma cell chemoresistance and migration in multicellular tumor spheroids. *Sci. Rep.* **6**, 36750 (2016).
- (96) Schon, H.T. *et al.* Pharmacological intervention in hepatic stellate cell activation and hepatic fibrosis. *Front. Pharmacol.* **7**, 33 (2016).

- (97) Fujita, T. & Narumiya, S. Roles of hepatic stellate cells in liver inflammation: a new perspective. *Inflamm. Regen.* **36**, 1 (2016).
- (98) Pamies, D. *et al.* Advanced Good Cell Culture Practice for human primary, stem cell-derived and organoid models as well as microphysiological systems. *ALTEX* **35**, 353-378 (2018).
- (99) Li, M. *et al.* Identification of interspecies difference in efflux transporters of hepatocytes from dog, rat, monkey and human. *Eur. J. Pharm. Sci.* **35**, 114-126 (2008).
- (100) Richert, L. *et al.* Species differences in the response of liver drug-metabolizing enzymes to (S)-4-O-tolylsulfanyl-2-(4-trifluormethyl-phenoxy)-butyric acid (EMD 392949) in vivo and in vitro. *Drug Metab. Dispos.* **36**, 702-714 (2008).
- (101) Dohnal, V., Wu, Q. & Kuca, K. Metabolism of aflatoxins: key enzymes and interindividual as well as interspecies differences. *Arch. Toxicol.* **88**, 1635-1644 (2014).
- (102) Toutain, P.L., Ferran, A. & Bousquet-Melou, A. Species differences in pharmacokinetics and pharmacodynamics. *Handb. Exp. Pharmacol.* 19-48 (2010).
- (103) Tsamandouras, N., Kostrzewski, T., Stokes, C.L., Griffith, L.G., Hughes, D.J. & Cirit, M. Quantitative assessment of population variability in hepatic drug metabolism using a perfused three-dimensional human liver microphysiological system. *J. Pharmacol. Exp. Ther.* **360**, 95-105 (2017).
- (104) Schepers, A., Li, C., Chhabra, A., Seney, B.T. & Bhatia, S. Engineering a perfusable 3D human liver platform from iPS cells. *Lab. Chip* **16**, 2644-2653 (2016).
- (105) Raasch, M., Fritsche, E., Kurtz, A., Bauer, M. & Mosig, A.S. Microphysiological systems meet hiPSC technology - new tools for disease modeling of liver infections in basic research and drug development. *Adv. Drug Deliv. Rev.* (2018 Jun 15 - Epub ahead of print).
- (106) Gieseck, R.L., 3rd *et al.* Maturation of induced pluripotent stem cell derived hepatocytes by 3D-culture. *PLoS One* **9**, e86372 (2014).
- (107) Kvist, A.J. *et al.* Critical differences in drug metabolic properties of human hepatic cellular models, including primary human hepatocytes, stem cell derived hepatocytes, and hepatoma cell lines. *Biochem. Pharmacol.* **155**, 124-140 (2018).
- (108) Xu, Z. *et al.* Analysis of differentially expressed genes among human hair follicle-derived iPSCs, induced hepatocyte-like cells, and primary hepatocytes. *Stem Cell Res. Ther.* **9**, 211 (2018).
- (109) Heslop, J.A. *et al.* Donor-dependent and other nondefined factors have greater influence on the hepatic phenotype than the starting cell type in induced pluripotent stem cell derived hepatocyte-like cells. *Stem Cells Transl. Med.* **6**, 1321-1331 (2017).
- (110) Werner, M. *et al.* All-in-one: advanced preparation of human parenchymal and non-parenchymal liver cells. *PLoS One* **10**, e0138655 (2015).
- (111) Germain, P.L. & Testa, G. Taming human genetic variability: transcriptomic meta-analysis guides the experimental design and interpretation of iPSC-based disease modeling. *Stem Cell Reports* **8**, 1784-1796 (2017).
- (112) Li, H. *et al.* Generation of functional hepatocytes from human adipose-derived MYC(+) KLF4(+) GMNN(+) stem cells analyzed by single-cell RNA-seq profiling. *Stem Cells Transl. Med.* **7**, 792-805 (2018).
- (113) Okumura, H., Nakanishi, A., Hashita, T., Iwao, T. & Matsunaga, T. Effect of celecoxib on differentiation of human induced pluripotent stem cells into hepatocytes involves STAT5 activation. *Drug. Metab. Dispos.* **46**, 1519-1527 (2018).
- (114) Kimura, K., Horiguchi, I., Kido, T., Miyajima, A. & Sakai, Y. Enhanced hepatic differentiation of human iPS cells using gas permeable membrane. *Tissue. Eng. Part A* (2018 Aug 24 - Epub ahead of print).
- (115) Huang, C.S. *et al.* Generation of high quality of hepatocyte-like cells from induced pluripotent stem cells with Parp1 but lacking c-Myc. *J. Chin. Med. Assoc.* **81**, 871-7 (2018).

- (116) Zorn, A.M. *Liver development*. (2008). Available at: <https://www.ncbi.nlm.nih.gov/books/NBK27068/> (accessed 22<sup>nd</sup> February 2019)
- (117) Goldman, O. *et al.* Endoderm generates endothelial cells during liver development. *Stem Cell Reports* **3**, 556-565 (2014).
- (118) Yang, L. *et al.* The contributions of mesoderm-derived cells in liver development. *Semin. Cell Dev. Biol.* (2018 Sep 10 - Epub ahead of print).
- (119) Roy-Chowdhury, N., Wang, X., Guha, C. & Roy-Chowdhury, J. Hepatocyte-like cells derived from induced pluripotent stem cells. *Hepatol. Int.* **11**, 54-69 (2017).
- (120) Buchrieser, J., James, W. & Moore, M.D. Human induced pluripotent stem cell-derived macrophages share ontogeny with MYB-independent tissue-resident macrophages. *Stem Cell Reports* **8**, 334-345 (2017).
- (121) Coll, M. *et al.* Generation of hepatic stellate cells from human pluripotent stem cells enables in vitro modeling of liver fibrosis. *Cell Stem Cell* **23**, 101-113 e7 (2018).
- (122) Kiamehr, M. *et al.* hiPSC-derived hepatocytes closely mimic the lipid profile of primary hepatocytes: a future personalised cell model for studying the lipid metabolism of the liver. *J. Cell. Physiol.* **234**, 3744-3761 (2019).
- (123) Ulvestad, M. *et al.* Drug metabolizing enzyme and transporter protein profiles of hepatocytes derived from human embryonic and induced pluripotent stem cells. *Biochem. Pharmacol.* **86**, 691-702 (2013).
- (124) Berger, D.R., Ware, B.R., Davidson, M.D., Allsup, S.R. & Khetani, S.R. Enhancing the functional maturity of induced pluripotent stem cell-derived human hepatocytes by controlled presentation of cell-cell interactions in vitro. *Hepatology* **61**, 1370-1381 (2015).
